# Supplementary material for: Intermittent hypoxic training improves anaerobic performance in competitive swimmers when implemented into a direct competition mesocycle
Source: PubMed Central journal article supplement (PMC5538675; doi:10.1371/journal.pone.0180380), 2017-08-01
Supplement: pone.0180380.s002.pdf [file pone.0180380.s002.pdf]

| Group | Subject | 100m S1(s) | 100m S2(s) | 200m S1(s) | 200m S2(s) |
|-------|---------|------------|------------|------------|------------|
| H     | 1       | 54,63      | 53,40      | 119,13     | 117,11     |
| H     | 2       | 53,37      | 52,30      | 118,55     | 116,05     |
| H     | 3       | 51,98      | 50,73      | 113,98     | 111,82     |
| H     | 4       | 56,48      | 55,64      | 124,3      | 122,38     |
| H     | 5       | 52,80      | 51,37      | 116,61     | 114,83     |
| H     | 6       | 56,50      | 55,78      | 120,8      | 118,65     |
| H     | 7       | 53,45      | 52,11      | 119,02     | 116,77     |
| H     | 8       | 54,53      | 53,38      | 121,35     | 118,97     |
| C     | 1       | 53,88      | 53,36      | 117,33     | 116,49     |
| C     | 2       | 53,83      | 53,27      | 118,43     | 117,72     |
| C     | 3       | 56,98      | 56,21      | 120,42     | 119,58     |
| C     | 4       | 55,29      | 54,78      | 118,78     | 117,52     |
| C     | 5       | 55,98      | 55,32      | 121,12     | 120,01     |
| C     | 6       | 56,21      | 55,76      | 120,34     | 119,11     |
| C     | 7       | 56,73      | 56,11      | 122,21     | 121,02     |
