# Supplementary material for: Intermittent hypoxic training improves anaerobic performance in competitive swimmers when implemented into a direct competition mesocycle
Source: PubMed Central journal article supplement (PMC5538675; doi:10.1371/journal.pone.0180380), 2017-08-01
Supplement: pone.0180380.s003.pdf [file pone.0180380.s003.pdf]

| Group | Subject | UArest<br>S1 | UArest<br>S2 | delta<br>UA S1 | delta<br>UA S2 |
|-------|---------|--------------|--------------|----------------|----------------|
| H     | 1       | 38,73        | 44,90        | 10,44          | 3,98           |
| H     | 2       | 37,18        | 40,80        | 9,25           | 5,83           |
| H     | 3       | 39,12        | 29,12        | -1,48          | 4,26           |
| H     | 4       | 38,04        | 31,40        | 14,18          | 8,45           |
| H     | 5       | 23,35        | 30,43        | 9,40           | 4,63           |
| H     | 6       | 29,92        | 36,71        | 11,25          | 4,78           |
| H     | 7       | 32,91        | 26,88        | 5,36           | 2,62           |
| H     | 8       | 39,30        | 38,65        | 11,27          | 3,82           |
| C     | 1       | 42,18        | 36,28        | 6,69           | 3,65           |
| C     | 2       | 36,46        | 29,96        | 6,42           | 3,39           |
| C     | 3       | 48,90        | 44,85        | 2,19           | 2,13           |
| C     | 4       | 56,30        | 53,98        | 1,56           | 4,23           |
| C     | 5       | 44,43        | 39,99        | 5,35           | 3,85           |
| C     | 6       | 35,80        | 28,23        | 4,15           | 3,99           |
| C     | 7       | 44,55        | 43,63        | 3,12           | 3,29           |
