# Supplementary material for: Intermittent hypoxic training improves anaerobic performance in competitive swimmers when implemented into a direct competition mesocycle
Source: PubMed Central journal article supplement (PMC5538675; doi:10.1371/journal.pone.0180380), 2017-08-01
Supplement: pone.0180380.s004.pdf [file pone.0180380.s004.pdf]

| Group | Subject | RBC S1<br>(mln/ $\mu$ l) | RBC S2<br>(mln/ $\mu$ l) | HGB S1<br>(g/dl) | HGB S2<br>(g/dl) | HCT S1<br>(%) | HCT S2<br>(%) |
|-------|---------|--------------------------|--------------------------|------------------|------------------|---------------|---------------|
| H     | 1       | 5,2                      | 5,51                     | 15,7             | 16,3             | 44,8          | 47,2          |
| H     | 2       | 4,84                     | 4,73                     | 15,3             | 14,9             | 43,8          | 42,9          |
| H     | 3       | 5,35                     | 5,49                     | 15,6             | 16,7             | 46,8          | 49,2          |
| H     | 4       | 5,11                     | 5,12                     | 15,6             | 15,7             | 56,9          | 46,8          |
| H     | 5       | 4,74                     | 4,87                     | 14,7             | 15,1             | 43,5          | 45,2          |
| H     | 6       | 5                        | 5,03                     | 16,1             | 16,3             | 46,5          | 47,1          |
| H     | 7       | 5,09                     | 5,03                     | 15               | 14,9             | 45,1          | 43,9          |
| H     | 8       | 5,07                     | 5,1                      | 15,3             | 15,5             | 46,5          | 47,7          |
| C     | 1       | 4,74                     | 4,63                     | 14,4             | 14,3             | 43,5          | 42,6          |
| C     | 2       | 5,1                      | 5,32                     | 14,5             | 14,4             | 44,1          | 45,5          |
| C     | 3       | 5,32                     | 5,06                     | 15,9             | 15,5             | 47,2          | 45,5          |
| C     | 4       | 5,54                     | 5,36                     | 16,2             | 16,3             | 49,2          | 48,4          |
| C     | 5       | 5,14                     | 5,52                     | 15,9             | 15,5             | 45,2          | 47,4          |
| C     | 6       | 5,63                     | 5,51                     | 16,2             | 16,5             | 47,9          | 47,6          |
| C     | 7       | 5,54                     | 5,4                      | 16,1             | 16               | 46,3          | 46,1          |
