# Supplementary material for: Intermittent hypoxic training improves anaerobic performance in competitive swimmers when implemented into a direct competition mesocycle
Source: PubMed Central journal article supplement (PMC5538675; doi:10.1371/journal.pone.0180380), 2017-08-01
Supplement: pone.0180380.s005.pdf [file pone.0180380.s005.pdf]

| Group | Subject | WRmax<br>S1 (W) | Wrmax<br>S2 (W) | VO2max<br>S1<br>(l/min) | VO2max<br>S2<br>(l/min) | VO2max<br>S1<br>(ml/min/kg) | VO2max<br>S2<br>(ml/kg/min) | RERmax<br>S1 | RERmax<br>S2 | VEmax<br>S1<br>(l/min) | VEmax<br>S2<br>(l/min) | HRmax<br>S1<br>(bpm) | Hrmax<br>S2<br>(bpm) | Delta<br>LA S1<br>(mmol/l) | Delta<br>LA S2<br>(mmol/l) |
|-------|---------|-----------------|-----------------|-------------------------|-------------------------|-----------------------------|-----------------------------|--------------|--------------|------------------------|------------------------|----------------------|----------------------|----------------------------|----------------------------|
| H     | 1       | 398             | 417             | 4,39                    | 4,541                   | 61                          | 66                          | 1,08         | 1,09         | 172,8                  | 171                    | 191                  | 204                  | 7,95                       | 10,1                       |
| H     | 2       | 345             | 386             | 4,104                   | 4,37                    | 55                          | 59                          | 1,11         | 1,12         | 132,5                  | 166                    | 184                  | 188                  | 8,02                       | 9,45                       |
| H     | 3       | 355             | 386             | 4,283                   | 4,541                   | 54                          | 58                          | 1,15         | 1,19         | 156,6                  | 166                    | 190                  | 193                  | 9,71                       | 11,91                      |
| H     | 4       | 347             | 381             | 3,976                   | 4,338                   | 56                          | 60                          | 1,13         | 1,16         | 163,3                  | 196,2                  | 180                  | 188                  | 10,46                      | 13,65                      |
| H     | 5       | 361             | 369             | 3,841                   | 4,014                   | 52                          | 56                          | 1,1          | 1,1          | 187                    | 221,6                  | 185                  | 189                  | 8,94                       | 10,72                      |
| H     | 6       | 331             | 365             | 4,415                   | 4,846                   | 50                          | 54                          | 1,11         | 1,12         | 180                    | 189,8                  | 182                  | 186                  | 8,88                       | 9,95                       |
| H     | 7       | 383             | 394             | 4,601                   | 4,721                   | 59                          | 60                          | 1,1          | 1,1          | 207,6                  | 198,1                  | 195                  | 190                  | 10,19                      | 11,51                      |
| H     | 8       | 376             | 412             | 4,625                   | 5,023                   | 61                          | 66                          | 1,13         | 1,13         | 182                    | 188,2                  | 196                  | 201                  | 9,01                       | 11,11                      |
| C     | 1       | 331             | 345             | 3,816                   | 4,1                     | 55                          | 59                          | 1,19         | 1,13         | 176,1                  | 183                    | 172                  | 178                  | 8,88                       | 9,78                       |
| C     | 2       | 385             | 399             | 4,209                   | 4,45                    | 60                          | 63                          | 1,15         | 1,1          | 170                    | 168,6                  | 180                  | 190                  | 9,03                       | 10,15                      |
| C     | 3       | 323             | 323             | 3,391                   | 3,546                   | 44                          | 46                          | 1,19         | 1,16         | 137,1                  | 112,9                  | 192                  | 190                  | 11,5                       | 11,9                       |
| C     | 4       | 348             | 361             | 4,02                    | 4,198                   | 49                          | 51                          | 1,12         | 1,12         | 141,1                  | 143,1                  | 180                  | 174                  | 9,64                       | 9,82                       |
| C     | 5       | 361             | 374             | 4,09                    | 4,153                   | 52                          | 53                          | 1,19         | 1,19         | 181,9                  | 187,6                  | 168                  | 169                  | 7,84                       | 8,54                       |
| C     | 6       | 311             | 324             | 3,611                   | 3,574                   | 56                          | 55                          | 1,1          | 1,15         | 147                    | 167,2                  | 190                  | 188                  | 8,22                       | 8,78                       |
| C     | 7       | 411             | 422             | 4,673                   | 4,964                   | 62                          | 65                          | 1,1          | 1,11         | 178                    | 198,8                  | 195                  | 191                  | 10,32                      | 11,1                       |

| Group | Subject | Delta LAres12 S1 (mmol/l) | Delta LAres12 S2 (mmol/l) | Delta pH S1 | Delta pH S2 | SpO2 S1 (%) | SpO2 S2 (%) |
|-------|---------|---------------------------|---------------------------|-------------|-------------|-------------|-------------|
| H     | 1       | 1,72                      | 3,02                      | -0,145      | -0,175      | 94,9        | 94,6        |
| H     | 2       | 1,91                      | 2,58                      | -0,132      | -0,133      | 94,5        | 94,1        |
| H     | 3       | 3,39                      | 2,75                      | -0,225      | -0,261      | 96,7        | 95          |
| H     | 4       | 2,89                      | 1,93                      | -0,115      | -0,158      | 96,1        | 93,3        |
| H     | 5       | 3,14                      | 4,52                      | -0,121      | -0,172      | 97,2        | 96,1        |
| H     | 6       | 4,08                      | 5,16                      | -0,09       | -0,108      | 96,4        | 97,1        |
| H     | 7       | 2,31                      | 2,56                      | -0,226      | -0,214      | 95          | 93,1        |
| H     | 8       | 3,87                      | 3,45                      | -0,123      | -0,207      | 94,8        | 94,3        |
| C     | 1       | 3,62                      | 3,15                      | -0,184      | -0,191      | 94,5        | 96,6        |
| C     | 2       | 2,46                      | 2,38                      | -0,125      | -0,155      | 94,8        | 94,2        |
| C     | 3       | 2,41                      | 5,47                      | -0,163      | -0,161      | 94,1        | 95          |
| C     | 4       | 1,45                      | 2,22                      | -0,186      | -0,175      | 95,1        | 92,6        |
| C     | 5       | 2,87                      | 3,02                      | -0,09       | -0,089      | 96,5        | 94,6        |
| C     | 6       | 2,24                      | 2,09                      | -0,11       | -0,121      | 96,4        | 96,6        |
| C     | 7       | 2,18                      | 2,55                      | -0,19       | -0,185      | 95,8        | 94,8        |
