# Supplementary material for: Intermittent hypoxic training improves anaerobic performance in competitive swimmers when implemented into a direct competition mesocycle
Source: PubMed Central journal article supplement (PMC5538675; doi:10.1371/journal.pone.0180380), 2017-08-01
Supplement: pone.0180380.s006.pdf [file pone.0180380.s006.pdf]

| Group | Subject | Ppeak I S1<br>(W) | Ppeak I S2<br>(W) | Ppeak II S1<br>(W) | Ppeak II S2<br>(W) | Pmean I S1<br>(W) | Pmean I S2<br>(W) | Pmean II<br>S1 (W) | Pmean II<br>S2 (W) |
|-------|---------|-------------------|-------------------|--------------------|--------------------|-------------------|-------------------|--------------------|--------------------|
| H     | 1       | 567,62            | 704,3             | 559,25             | 687,25             | 403,3             | 468,98            | 388,24             | 452,76             |
| H     | 2       | 865,03            | 897,5             | 610,05             | 731,55             | 440,1             | 503,87            | 419,54             | 452,87             |
| H     | 3       | 759,77            | 777,2             | 703,65             | 768,46             | 473,2             | 508,01            | 455,76             | 494,68             |
| H     | 4       | 755,3             | 779               | 665,09             | 798,57             | 444,3             | 462,46            | 423,44             | 441,85             |
| H     | 5       | 598,19            | 661               | 587,45             | 676,42             | 433,1             | 492,41            | 398,86             | 492,29             |
| H     | 6       | 902,57            | 938,6             | 714,64             | 1022               | 480,1             | 598,19            | 450,05             | 535,13             |
| H     | 7       | 828,5             | 933,9             | 809,94             | 824,41             | 523               | 553,38            | 456,26             | 494,78             |
| H     | 8       | 651,33            | 783,1             | 609,06             | 836,41             | 424,8             | 459,5             | 415,23             | 451,69             |
| C     | 1       | 597,4             | 703,3             | 614,83             | 608,36             | 451,2             | 478,4             | 409,17             | 431,8              |
| C     | 2       | 640,12            | 640,1             | 487,18             | 487,18             | 418,8             | 418,81            | 383,61             | 402,1              |
| C     | 3       | 930,76            | 1050              | 841,22             | 815,8              | 456,3             | 496,26            | 398,5              | 412,5              |
| C     | 4       | 852,73            | 863,4             | 622,1              | 951,61             | 407,1             | 431,27            | 405,7              | 422,56             |
| C     | 5       | 952,68            | 1039              | 892,13             | 1064,7             | 453,1             | 464               | 425,6              | 437,61             |
| C     | 6       | 690,2             | 913,2             | 609,23             | 814,64             | 366,8             | 405,41            | 349,94             | 365,2              |
| C     | 7       | 671,79            | 1004              | 627,07             | 985,25             | 478,1             | 484,35            | 415,2              | 421,69             |

| Group | Subject | Delta LA S1 (mmol/l) | Delta LA S2 (mmol/l) | Delta LA 12res S1 (mmol/l) | Delta LA 12res S2 (mmol/l) | Dela pH S1 | Dela pH S2 | SpO2 S1 (%) | SpO2 S2 (%) |
|-------|---------|----------------------|----------------------|----------------------------|----------------------------|------------|------------|-------------|-------------|
| H     | 1       | 6,93                 | 11,33                | 1,2                        | 1,28                       | -0,158     | -0,211     | 97,1        | 96,1        |
| H     | 2       | 9,11                 | 11,51                | 3,13                       | 2,81                       | -0,151     | -0,184     | 96,6        | 96          |
| H     | 3       | 8,17                 | 9,64                 | 1,61                       | 1,29                       | -0,139     | -0,18      | 97,1        | 96,3        |
| H     | 4       | 10,86                | 9,57                 | 2,81                       | 2,26                       | -0,16      | -0,176     | 96,8        | 95,9        |
| H     | 5       | 5,9                  | 14,85                | 2,24                       | 2,33                       | -0,142     | -0,299     | 97,1        | 96          |
| H     | 6       | 8,65                 | 13,92                | 2,85                       | 2,25                       | -0,128     | -0,226     | 97,4        | 96,5        |
| H     | 7       | 13,79                | 13,97                | 1,8                        | 1,24                       | -0,234     | -0,314     | 96,6        | 96          |
| H     | 8       | 9,93                 | 10,22                | 1,97                       | 2,29                       | -0,15      | -0,197     | 96,8        | 96,4        |
| C     | 1       | 11,68                | 11,34                | 3,24                       | 2,15                       | -0,166     | -0,226     | 96          | 97          |
| C     | 2       | 13,18                | 13,18                | 2,35                       | 2,35                       | -0,212     | -0,212     | 97,1        | 97,1        |
| C     | 3       | 17,46                | 14,05                | 1,57                       | 2,15                       | -0,259     | -0,252     | 94,8        | 95,5        |
| C     | 4       | 13,52                | 12,55                | 1,77                       | 1,24                       | -0,236     | -0,248     | 95,2        | 96,7        |
| C     | 5       | 10,29                | 8,85                 | 3,35                       | 3,13                       | -0,133     | -0,142     | 96,2        | 95,9        |
| C     | 6       | 12,46                | 12,13                | 2,26                       | 2,97                       | -0,2       | -0,193     | 95,8        | 96,5        |
| C     | 7       | 10,12                | 10,51                | 0,55                       | 1,07                       | -0,123     | -0,134     | 87,2        | 87,2        |
