# Supplementary material for: Intermittent hypoxic training improves anaerobic performance in competitive swimmers when implemented into a direct competition mesocycle
Source: PLoS One. 2017 Aug 1;12(8):e0180380. doi: 10.1371/journal.pone.0180380 (PMC5538675; doi:10.1371/journal.pone.0180380)
Supplement: S1 Fig — H- experimental group, C–control group, S1—before training, S2 –after training, BM–body mass, Fat—fat content. (PDF) [file pone.0180380.s001.pdf]

| Group | Subject | BM S1<br>(kg) | BM S2<br>(kg) | Fat S1<br>(%) | Fat S2<br>(%) |
|-------|---------|---------------|---------------|---------------|---------------|
| H     | 1       | 71,4          | 69,4          | 5,3           | 5             |
| H     | 2       | 74,6          | 74,6          | 7,5           | 7             |
| H     | 3       | 78,3          | 79,1          | 11,6          | 10,9          |
| H     | 4       | 71,5          | 72,2          | 8,7           | 7,3           |
| H     | 5       | 74,3          | 71,7          | 10,2          | 8,9           |
| H     | 6       | 88,5          | 88,5          | 16,7          | 16,7          |
| H     | 7       | 77,9          | 77,8          | 7,6           | 7             |
| H     | 8       | 75,4          | 76,7          | 6,9           | 5,3           |
| C     | 1       | 70,1          | 70,1          | 11,2          | 11,1          |
| C     | 2       | 69,8          | 69,9          | 7,6           | 7,2           |
| C     | 3       | 77,3          | 77,6          | 11,3          | 10,4          |
| C     | 4       | 82,6          | 81,8          | 11,3          | 10,2          |
| C     | 5       | 78            | 78,8          | 9,3           | 9             |
| C     | 6       | 64,1          | 64,5          | 8,2           | 7,4           |
| C     | 7       | 77            | 76,9          | 8,2           | 7,9           |
